# Supplementary material for: Time-optimized pulsed dynamic nuclear polarization
Source: PubMed Central journal article supplement — Sci Adv. 2019 Jan 18;5(1):eaav6909. doi: 10.1126/sciadv.aav6909 (PMC6357739; doi:10.1126/sciadv.aav6909), 2019-01-18
Supplement: aav6909_SM.pdf [file aav6909_SM.pdf]

## Supplementary Materials for

### Time-optimized pulsed dynamic nuclear polarization

Kong Ooi Tan, Chen Yang, Ralph T. Weber, Guinevere Mathies, Robert G. Griffin\*

\*Corresponding author. Email: [rgg@mit.edu](mailto:rgg@mit.edu)

Published 18 January 2019, *Sci. Adv.* **5**, eaav6909 (2019)

DOI: [10.1126/sciadv.aav6909](https://doi.org/10.1126/sciadv.aav6909)

#### **This PDF file includes:**

Section S1. Determining the effective field  $\omega_{\text{eff}}$  with quaternions

Section S2. Experimental details of NOVEL

Fig. S1. Experimentally measured enhancements of the NOVEL sequence as a function of the Rabi frequency at 0.35 T.

# Supplementary Materials

## Section S1. Determining the effective field $\omega_{\text{eff}}$ with quaternions

We have defined that the effective field  $\omega_{\text{eff}}$  as the net rotation angle  $\beta_{\text{eff}}$  accumulated over a period of the cycle time  $\tau_m = 2\pi/(\omega_m)$  of a pulse sequence. We can determine  $\beta_{\text{eff}}$  analytically using the quaternion description (35). The quaternion is comprised of 4 variables, which are the flip angle  $\beta$  and the three unit-axis components of the rotation  $S_{xx}$ ,  $S_{yy}$  and  $S_{zz}$ . For TOP-DNP, which is a basic cyclic sequence comprised of two elements (a pulse and a delay), the effective nutation angle  $\beta_{\text{eff}}$  can be determined by computing

$$Q_{\text{eff}} = Q_2 Q_1 \quad (1)$$

where the lower index represents the chronological order of the pulse, i.e.  $Q_1$  represents the off-resonance pulse and  $Q_2$  is the event when the microwave is turned off and the rotation is performed only by the offset  $\Omega_S$ . The matrix representations of the respective quaternions are given as

$$Q_1 = \begin{bmatrix} A_1 \\ B_1 \\ C_1 \\ D_1 \end{bmatrix} \text{ and } Q_2 = \begin{bmatrix} D_2 & -C_2 & B_2 & A_2 \\ C_2 & D_2 & -A_2 & B_2 \\ -B_2 & A_2 & D_2 & C_2 \\ -A_2 & -B_2 & -C_2 & D_2 \end{bmatrix} \quad (2)$$

where the symbols  $A_i$ ,  $B_i$ ,  $C_i$  and  $D_i$  of the respective quaternion  $Q_i$  are

$$A_i = S_{xx}^i \sin\left(\frac{\beta_i}{2}\right), B_i = S_{yy}^i \sin\left(\frac{\beta_i}{2}\right), C_i = S_{zz}^i \sin\left(\frac{\beta_i}{2}\right), D_i = \cos\left(\frac{\beta_i}{2}\right) \quad (3)$$

Following that, we identify that the first rotation performed by the microwave pulse at an offset  $\Omega_S$  with a pulse length of  $\tau_p$  along  $x$ -axis in the rotating frame is given by

$$A_1 = \sin \theta \sin \left( \frac{\omega_a \tau_p}{2} \right), B_1 = 0, C_1 = \cos \theta \sin \left( \frac{\omega_a \tau_p}{2} \right), D_1 = \cos \left( \frac{\omega_a \tau_p}{2} \right) \quad (4)$$

where  $\omega_a = \sqrt{\omega_{1S}^2 + \Omega_S^2}$  and  $\theta = \tan^{-1} \omega_{1S}/\Omega_S$ . While the second rotation is only performed by the offset  $\Omega_S$  along the  $z$ -axis with a delay of  $d$

$$A_2 = B_2 = 0, C_2 = \sin \left( \frac{\Omega_S d}{2} \right), D_2 = \cos \left( \frac{\Omega_S d}{2} \right) \quad (5)$$

According to the definition given in the formulation of the quaternion description, the overall net rotation  $\beta_{\text{eff}}$  of the TOP-DNP sequence is encoded in  $Q_{\text{eff}}$

$$Q_{\text{eff}} = \begin{bmatrix} S_{xx}^{\text{eff}} \sin \left( \frac{\beta_{\text{eff}}}{2} \right) \\ S_{yy}^{\text{eff}} \sin \left( \frac{\beta_{\text{eff}}}{2} \right) \\ S_{zz}^{\text{eff}} \sin \left( \frac{\beta_{\text{eff}}}{2} \right) \\ \cos \left( \frac{\beta_{\text{eff}}}{2} \right) \end{bmatrix} = Q_2 Q_1 \quad (6)$$

Since we are only interested in the last matrix element,  $\cos \left( \frac{\beta_{\text{eff}}}{2} \right)$ , we can write down the expression directly

$$\cos \left( \frac{\beta_{\text{eff}}}{2} \right) = D_1 D_2 - (A_1 A_2 + B_1 B_2 + C_1 C_2) \quad (7)$$

$$\beta_{\text{eff}} = 2 \cos^{-1}(\cos(\Omega_S d/2) \cos(\omega_a \tau_p/2) - \cos \theta \sin(\Omega_S d/2) \sin(\omega_a \tau_p/2))$$

as given in the main article after substituting into the equation  $\omega_{\text{eff}} = \beta_{\text{eff}}/\tau_m$ .

## Section S2. Experimental details of NOVEL

We have performed the NOVEL experiment on the same sample to compare the results with that measured with TOP-DNP. We have optimized several parameters and obtained a maximum enhancement of  $\varepsilon \sim 172$ , which is in good agreement with the value of  $\sim 175$  reported by Can et al.(37) despite a higher concentration of radical ( $\sim 40$  mM) was used in latter experiment. Besides that, Mathies et al.(19) had also reported an enhancement of  $\varepsilon \sim 159$  on a similar setup except that the sample contains 1 M urea. Note that the value of 159 was obtained by normalizing the reported value of 380 with respect to the definition of enhancement factor  $\varepsilon$  adopted in this publication for fair comparison, i.e. normalization with respect to equilibrated DNP enhancement and fully relaxed  $^1\text{H}$  signal,

$\frac{(1-\exp(-8/8))}{(1-\exp(-8/26))} \times 380 = 159$ . This is a fairly consistent result considering the fact that the

experiments were performed by three different individuals and three different sample were prepared.

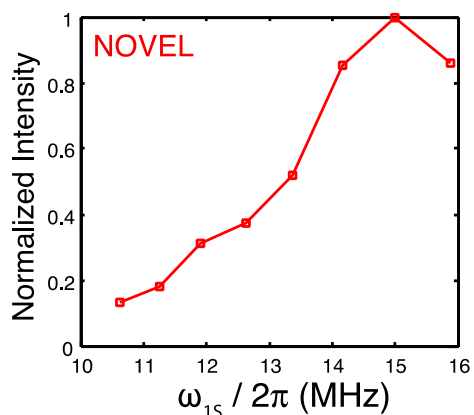

**Fig. S1. Experimentally measured enhancements of the NOVEL sequence as a function of the Rabi frequency at 0.35 T.** A maximum enhancement of  $\varepsilon \sim 172$  was recorded using  $\omega_{1S}/2\pi = 15$  MHz, repetition time  $\tau_{\text{Rep}} = 2$  ms, spin lock time of  $\tau_{\text{SL}} = 2$   $\mu\text{s}$ , 16384 repetitions ( $\sim 33$  s), and a flip-back pulse was applied after the spinlock to conserve magnetization (19).
